# Supplementary material for: Anoikis-related gene signature associates with the immune infiltration and predicts the prognosis of glioma patients
Source: Research Square preprint supplement (doi:10.21203/rs.3.rs-3294981/v1), 2023-10-11
Supplement: Supplementary file 1 [file 480b5592400ab9a99debcb5a.xlsx]

## Sheet: Sheet1
GO
ONTOLOGY	ID	Description	GeneRatio	BgRatio	pvalue	p.adjust	qvalue	geneID
CC	GO:0062023	collagen-containing extracellular matrix	54/544	433/19869	7.98e-21	2.25e-18	1.53e-18	ANXA1/TIMP1/ANXA2/SERPINH1/S100A4/COL4A2/COL4A1/SERPINA1/SERPINA5/SERPING1/SRPX2/CBLN1/SERPINE1/COL5A2/EMILIN2/SERPINA3/EFEMP2/TNR/COL1A1/COL6A2/PCOLCE/LOX/COL3A1/COL5A1/COL8A1/LOXL1/TGFB2/POSTN/GDF15/SMOC1/COL1A2/FMOD/LGALS3/AEBP1/MFAP2/MMP9/TGFBI/MGP/RARRES2/GDF10/MXRA5/LUM/CTHRC1/TMEFF2/SFRP2/S100A9/EMILIN3/COL6A3/S100A8/L1CAM/THBS1/LEFTY2/F13A1/FREM3
MF	GO:0015267	channel activity	39/521	494/18432	8.08e-09	1.98e-07	1.49e-07	CLIC1/ANXA2/KCNIP3/NALF1/CACNG2/KCNIP2/TRPM8/ABCC8/GLRA3/KCNB1/CHRNA9/KCNJ11/GRIN3A/CHRNA4/KCNJ9/GABRB3/GABRG1/GABRA3/GRIA4/KCNK12/KCNK3/SCN3B/CACNA1I/GRIN1/GABRD/ASIC4/GABRG2/KCNH1/KCNJ3/CACNA1B/KCNT1/GRIN2B/CHRNA1/KCNC2/CACNG3/GABRB2/GABRA1/HCN1/GJB6
MF	GO:0022803	passive transmembrane transporter activity	39/521	495/18432	8.54e-09	1.98e-07	1.49e-07	CLIC1/ANXA2/KCNIP3/NALF1/CACNG2/KCNIP2/TRPM8/ABCC8/GLRA3/KCNB1/CHRNA9/KCNJ11/GRIN3A/CHRNA4/KCNJ9/GABRB3/GABRG1/GABRA3/GRIA4/KCNK12/KCNK3/SCN3B/CACNA1I/GRIN1/GABRD/ASIC4/GABRG2/KCNH1/KCNJ3/CACNA1B/KCNT1/GRIN2B/CHRNA1/KCNC2/CACNG3/GABRB2/GABRA1/HCN1/GJB6
BP	GO:0042391	regulation of membrane potential	38/516	431/18903	2.24e-10	8.21e-08	6.4e-08	CLIC1/GABBR1/CACNG2/KCNIP2/GLRA3/KCNB1/SLC1A6/CBLN1/CHRNA9/KCNJ11/CUX2/GRIN3A/CHRNA4/GABRB3/RIMS2/GABRG1/GABRA3/SLC8A2/KCNK12/CTNNA3/KCNK3/SCN3B/CACNA1I/GRIN1/CHRM1/GABRD/GABRG2/KCNH1/FGF13/KCNJ3/CELF4/GRIN2B/GRM5/CHRNA1/KCNC2/GABRB2/GABRA1/HCN1
MF	GO:0005216	ion channel activity	38/521	446/18432	1.56e-09	4.69e-08	3.55e-08	CLIC1/ANXA2/KCNIP3/NALF1/CACNG2/KCNIP2/TRPM8/ABCC8/GLRA3/KCNB1/CHRNA9/KCNJ11/GRIN3A/CHRNA4/KCNJ9/GABRB3/GABRG1/GABRA3/GRIA4/KCNK12/KCNK3/SCN3B/CACNA1I/GRIN1/GABRD/ASIC4/GABRG2/KCNH1/KCNJ3/CACNA1B/KCNT1/GRIN2B/CHRNA1/KCNC2/CACNG3/GABRB2/GABRA1/HCN1
CC	GO:1990351	transporter complex	35/544	405/19869	2.23e-09	7.86e-08	5.34e-08	CLIC1/MCUB/KCNIP3/CACNG2/KCNIP2/ABCC8/GLRA3/KCNB1/CHRNA9/KCNJ11/GRIN3A/CHRNA4/SHISA7/GABRB3/GABRG1/GABRA3/GRIA4/CNTNAP2/SCN3B/CACNA1I/GRIN1/GABRD/GABRG2/DPP10/KCNH1/ATP8A2/KCNJ3/CACNA1B/GRIN2B/CHRNA1/KCNC2/CACNG3/GABRB2/GABRA1/HCN1
BP	GO:0030198	extracellular matrix organization	34/516	318/18903	1.16e-11	1.1e-08	8.6e-09	PDPN/ANXA2/SERPINH1/COL4A2/COL4A1/MMP14/TNFRSF11B/RUNX1/PTX3/COL5A2/HPSE2/BMP2/EFEMP2/TNR/COL1A1/LOX/COL3A1/COL5A1/COL8A1/LOXL1/TGFB2/ITGB3/POSTN/SMOC1/COL1A2/FMOD/FERMT1/AEBP1/MMP9/MMP19/TGFBI/LUM/SFRP2/IL6
CC	GO:0034702	ion channel complex	34/544	296/19869	1.73e-12	1.22e-10	8.27e-11	CLIC1/MCUB/KCNIP3/CACNG2/KCNIP2/ABCC8/GLRA3/KCNB1/CHRNA9/KCNJ11/GRIN3A/CHRNA4/SHISA7/GABRB3/GABRG1/GABRA3/GRIA4/CNTNAP2/SCN3B/CACNA1I/GRIN1/GABRD/GABRG2/DPP10/KCNH1/KCNJ3/CACNA1B/GRIN2B/CHRNA1/KCNC2/CACNG3/GABRB2/GABRA1/HCN1
CC	GO:1902495	transmembrane transporter complex	34/544	379/19869	1.45e-09	5.86e-08	3.98e-08	CLIC1/MCUB/KCNIP3/CACNG2/KCNIP2/ABCC8/GLRA3/KCNB1/CHRNA9/KCNJ11/GRIN3A/CHRNA4/SHISA7/GABRB3/GABRG1/GABRA3/GRIA4/CNTNAP2/SCN3B/CACNA1I/GRIN1/GABRD/GABRG2/DPP10/KCNH1/KCNJ3/CACNA1B/GRIN2B/CHRNA1/KCNC2/CACNG3/GABRB2/GABRA1/HCN1
BP	GO:0022407	regulation of cell-cell adhesion	32/516	490/18903	5.3e-06	0.000306713	0.000239022	PDPN/ANXA1/IGFBP2/PLAUR/PTPN22/RUNX1/HLA-DRA/HLA-DRB1/CD74/TNFSF14/HLA-DPB1/HLA-DPA1/EMILIN2/IL4I1/HLA-DQA1/BMP2/TNR/PDCD1LG2/HLA-DOA/FUT9/HLA-DQB1/LGALS3/FCGR2B/ACTL6B/GPNMB/HLA-DRB5/IL1RN/IL6/KLRC4-KLRK1/CCL2/HLA-DQB2/HLA-DQA2
BP	GO:0002443	leukocyte mediated immunity	31/516	463/18903	4.5e-06	0.000268673	0.000209377	CSMD3/C1R/FCGR3A/SERPING1/HLA-DRA/CLCF1/TREM1/HLA-DRB1/CD74/HLA-DPB1/HLA-DPA1/IL4I1/HLA-DQA1/CFI/HLA-DOA/HLA-DQB1/GAPT/SPON2/CD2/IL13RA2/KLRC3/FCGR2B/HLA-DRB5/CPLX2/CHGA/ULBP1/KLRC2/IL6/KLRC4-KLRK1/HLA-DQB2/HLA-DQA2
CC	GO:0009897	external side of plasma membrane	29/544	462/19869	3.25e-05	0.00023534	0.00015988	ANXA1/MSR1/SERPINA5/FCGR3A/TRPM8/CXCL10/HLA-DRB1/CD74/CD248/CHRNA4/PDCD1LG2/ADGRE1/ITGB3/CCR5/GFRA1/CD2/IL13RA2/CXCL9/CD48/CD3D/KLRC3/FCGR2B/CD163/ULBP1/KCNJ3/KLRC2/KLRC4-KLRK1/CLEC4F/THBS1
BP	GO:0002449	lymphocyte mediated immunity	27/516	367/18903	3.34e-06	0.000237089	0.000184764	CSMD3/C1R/FCGR3A/SERPING1/HLA-DRA/CLCF1/HLA-DRB1/CD74/HLA-DPB1/HLA-DPA1/IL4I1/HLA-DQA1/CFI/HLA-DOA/HLA-DQB1/GAPT/CD2/IL13RA2/KLRC3/FCGR2B/HLA-DRB5/ULBP1/KLRC2/IL6/KLRC4-KLRK1/HLA-DQB2/HLA-DQA2
BP	GO:0050863	regulation of T cell activation	26/516	376/18903	1.52e-05	0.000633136	0.000493404	ANXA1/IGFBP2/PTPN22/RUNX1/HLA-DRA/HLA-DRB1/CD74/TNFSF14/HLA-DPB1/HLA-DPA1/IL4I1/HLA-DQA1/PDCD1LG2/HLA-DOA/HLA-DQB1/LGALS3/CD2/FCGR2B/ACTL6B/GPNMB/HLA-DRB5/IL6/KLRC4-KLRK1/CCL2/HLA-DQB2/HLA-DQA2
MF	GO:0005201	extracellular matrix structural constituent	26/521	173/18432	3.26e-12	4.9e-10	3.7e-10	CHI3L1/COL4A2/COL4A1/SRPX2/COL5A2/EMILIN2/EFEMP2/COL1A1/COL6A2/PCOLCE/COL3A1/COL5A1/COL8A1/POSTN/COL1A2/FMOD/AEBP1/MFAP2/TGFBI/MGP/MXRA5/LUM/CTHRC1/EMILIN3/COL6A3/THBS1
CC	GO:0060205	cytoplasmic vesicle lumen	24/544	325/19869	1.17e-05	0.000105541	7.17e-05	TIMP1/S100A11/ANXA2/CHI3L1/SERPINA1/LTF/SERPING1/PTX3/FABP5/SCG3/SERPINE1/SERPINA3/RNASE2/TGFB2/PLAC8/HSPA6/RARRES2/LYZ/S100A9/S100A8/F5/THBS1/LEFTY2/F13A1
MF	GO:0005125	cytokine activity	20/521	237/18432	1.42e-05	0.000164058	0.000123925	TIMP1/TNFRSF11B/CLCF1/CXCL10/TNFSF14/LIF/WNT7B/BMP2/SPP1/TGFB2/GDF15/SECTM1/CXCL9/GDF10/CXCL11/IL1RN/IL6/CCL2/LEFTY2/CXCL8
MF	GO:0140375	immune receptor activity	19/521	148/18432	3.9e-08	8.4e-07	6.34e-07	FCGR3A/HLA-DRA/HLA-DRB1/CD74/HLA-DPA1/HLA-DQA1/HLA-DOA/CCR5/GFRA1/HLA-DQB1/IL13RA2/FCGR2B/GPR17/KLRC2/FPR2/KLRC4-KLRK1/FPR3/HLA-DQB2/HLA-DQA2
KEGG
ID	Description	GeneRatio	BgRatio	pvalue	p.adjust	qvalue	geneID
hsa04080	Neuroactive ligand-receptor interaction	32/243	367/8220	2.94e-08	2.52e-06	2.07e-06	2834/2550/6751/8001/6752/55584/116443/1137/11255/2562/2565/2556/2893/3356/624/3001/2902/1128/2151/2563/2566/2914/133/2358/2359/7434/2904/2915/1134/7253/2561/2554
hsa04145	Phagosome	19/243	152/8220	9.48e-08	4.87e-06	4.01e-06	84790/4481/715/84617/2214/3122/9103/3123/3115/3113/3117/3111/3690/3119/2213/23480/3127/7057/3118
hsa04060	Cytokine-cytokine receptor interaction	18/243	295/8220	0.00279648	0.0199637	0.0164354	51330/4982/23529/3627/8740/3976/650/7042/1234/9518/3598/4283/2662/6373/3557/3569/6347/3576
hsa04514	Cell adhesion molecules	17/243	157/8220	3.51e-06	5.3e-05	4.36e-05	965/3122/3123/26050/3115/3113/3117/80380/3111/3119/26047/114798/914/3127/3897/6402/3118
hsa04612	Antigen processing and presentation	14/243	78/8220	5.09e-08	3.27e-06	2.69e-06	3122/3123/972/3115/10437/3113/3117/3111/3119/3310/3823/3127/3822/3118
hsa04510	Focal adhesion	14/243	201/8220	0.00249168	0.0194049	0.0159754	1284/1282/7143/1277/6696/1292/10451/57144/2318/3690/1278/5923/1293/7057
hsa05205	Proteoglycans in cancer	14/243	205/8220	0.00298511	0.0207344	0.0170699	4478/5329/5328/7477/60495/1277/10451/2318/7042/3690/1278/4318/4060/7057
hsa04610	Complement and coagulation cascades	13/243	86/8220	1.22e-06	3.25e-05	2.67e-05	5329/5265/715/5328/5104/710/5327/5054/3426/624/2151/2153/2162
hsa04659	Th17 cell differentiation	12/243	108/8220	7.65e-05	0.000910663	0.000749717	861/3122/3123/3115/3113/3117/3111/3119/915/3127/3569/3118
hsa04658	Th1 and Th2 cell differentiation	11/243	92/8220	7.8e-05	0.000910663	0.000749717	3122/3123/3115/3113/3117/3111/3119/915/3127/10683/3118
hsa04933	AGE-RAGE signaling pathway in diabetic complications	11/243	100/8220	0.000166825	0.00178642	0.00147069	1284/1282/5054/1277/1281/7042/1278/50507/3569/6347/3576
hsa04512	ECM-receptor interaction	10/243	88/8220	0.000252332	0.00249421	0.00205339	1284/1282/7143/1277/6696/1292/3690/1278/1293/7057
hsa04727	GABAergic synapse	10/243	89/8220	0.000277024	0.00263686	0.00217083	2550/55970/2562/2565/2556/2563/2566/774/2561/2554
hsa04724	Glutamatergic synapse	10/243	114/8220	0.00194734	0.0156396	0.0128755	55970/22941/6511/116443/2893/2902/2914/3760/2904/2915
hsa04657	IL-17 signaling pathway	8/243	94/8220	0.00648565	0.0406539	0.0334689	3627/8061/4318/6280/3569/6347/6279/3576
